# Supplementary material for: Genetic diversity and population structure of Yam (Dioscorea species) from Western Ethiopia as revealed by simple sequence repeat markers
Source: Research Square preprint supplement (doi:10.21203/rs.3.rs-1905131/v1), 2022-08-26

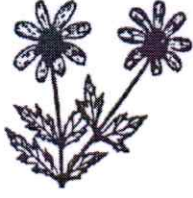

**THE NATIONAL HERBARIUM OF ETHIOPIA (ETH)**

*Department of Plant Biology & Biodiversity Management*

*College of Natural and Computational Sciences*

*Addis Ababa University*

*PO Box 3434 – Addis Ababa – Ethiopia*

*Email: [nationalherbarium.eth@aau.edu.et](mailto:nationalherbarium.eth@aau.edu.et); [nationalherbarium.eth@gmail.com](mailto:nationalherbarium.eth@gmail.com)*

Date: 16/8/2022

Ref. No. DPBAM/CNCS/711 114/22

**To whom it may concern**

Mr. Fekadu Korsu of Institute of Biotechnology, Addis Ababa University has submitted plant species to the National Herbarium of Ethiopia, Department of Plant Biology, Addis Ababa University for identification.

In view of this development, I certify that these plants were identified by Taxonomists of the National Herbarium of Ethiopia. Details of the identified plant specimens are enclosed with this letter and are duly stamped.

Yours sincerely,

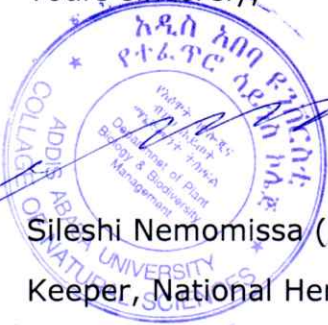

Sijeshi Nemomissa (Prof.)

Keeper, National Herbarium of Ethiopia (ETH)

Landraces and released varieties of *Dioscorea* species genotypes collected from the western parts of Ethiopia and used for the stt Totat species are 4  
Collection

Sample collection sites

| number  | Collector name     | Family Name          | Genus name       | Species name      | Zone        | Woreda     | Kebele      | Longitude   | Latitude   | Altitude (m) |
|---------|--------------------|----------------------|------------------|-------------------|-------------|------------|-------------|-------------|------------|--------------|
| WWGS 01 | Fekadu Korsa Hunde | <i>Dioscoreaceae</i> | <i>Dioscorea</i> | <i>cayenensis</i> | West Wolega | Gimbi      | G/Senbeta   | 035°51'36"E | 09°11'52"N | 1858         |
| WWGS 02 | Fekadu Korsa Hunde | <i>Dioscoreaceae</i> | <i>Dioscorea</i> | <i>cayenensis</i> | West Wolega | Gimbi      | G/Senbeta   | 035°52'10"E | 09°12'29"N | 1869         |
| WWGS 03 | Fekadu Korsa Hunde | <i>Dioscoreaceae</i> | <i>Dioscorea</i> | <i>bulbifera</i>  | West Wolega | Gimbi      | G/Senbeta   | 035°51'56"E | 09°11'50"N | 1881         |
| WWGS 04 | Fekadu Korsa Hunde | <i>Dioscoreaceae</i> | <i>Dioscorea</i> | <i>cayenensis</i> | West Wolega | Gimbi      | G/Senbeta   | 035°52'24"E | 09°13'21"N | 1750         |
| WWGM 05 | Fekadu Korsa Hunde | <i>Dioscoreaceae</i> | <i>Dioscorea</i> | <i>bulbifera</i>  | West Wolega | Gimbi      | M/Hola      | 035°50'21"E | 09°13'37"N | 1775         |
| WWGM 06 | Fekadu Korsa Hunde | <i>Dioscoreaceae</i> | <i>Dioscorea</i> | <i>cayenensis</i> | West Wolega | Gimbi      | M/Hola      | 035°49'43"E | 09°13'33"N | 1837         |
| WWGM 07 | Fekadu Korsa Hunde | <i>Dioscoreaceae</i> | <i>Dioscorea</i> | <i>cayenensis</i> | West Wolega | Gimbi      | M/Hola      | 035°49'38"E | 09°13'23"N | 1839         |
| WWLD 09 | Fekadu Korsa Hunde | <i>Dioscoreaceae</i> | <i>Dioscorea</i> | <i>bulbifera</i>  | West Wolega | Lalo Asabi | Dongoro     | 035°50'02"E | 09°04'59"N | 1997         |
| WWLD 10 | Fekadu Korsa Hunde | <i>Dioscoreaceae</i> | <i>Dioscorea</i> | <i>rotundata</i>  | West Wolega | Lalo Asabi | Dongoro     | 035°49'48"E | 09°05'04"N | 1954         |
| WWLD 11 | Fekadu Korsa Hunde | <i>Dioscoreaceae</i> | <i>Dioscorea</i> | <i>cayenensis</i> | West Wolega | Lalo Asabi | Dongoro     | 035°50'14"E | 09°04'52"N | 1917         |
| WWLD 12 | Fekadu Korsa Hunde | <i>Dioscoreaceae</i> | <i>Dioscorea</i> | <i>rotundata</i>  | West Wolega | Lalo Asabi | Dongoro     | 035°50'20"E | 09°05'08"N | 1914         |
| WWLD 14 | Fekadu Korsa Hunde | <i>Dioscoreaceae</i> | <i>Dioscorea</i> | <i>bulbifera</i>  | West Wolega | Lalo Asabi | Dongoro     | 035°50'19"E | 09°04'34"N | 1934         |
| WWLD 15 | Fekadu Korsa Hunde | <i>Dioscoreaceae</i> | <i>Dioscorea</i> | <i>rotundata</i>  | West Wolega | Lalo Asabi | Dongoro     | 045°50'56"E | 09°04'36"N | 1854         |
| WWLD 16 | Fekadu Korsa Hunde | <i>Dioscoreaceae</i> | <i>Dioscorea</i> | <i>cayenensis</i> | West Wolega | Lalo Asabi | Dongoro     | 035°50'33"E | 09°04'22"N | 1898         |
| WWLA 17 | Fekadu Korsa Hunde | <i>Dioscoreaceae</i> | <i>Dioscorea</i> | <i>rotundata</i>  | West Wolega | Lalo Asabi | Aroji Serdo | 035°50'02"E | 09°05'34"N | 2001         |
| WWLA 18 | Fekadu Korsa Hunde | <i>Dioscoreaceae</i> | <i>Dioscorea</i> | <i>rotundata</i>  | West Wolega | Lalo Asabi | Aroji Serdo | 035°50'43"E | 09°05'32"N | 1861         |
| WWLA 19 | Fekadu Korsa Hunde | <i>Dioscoreaceae</i> | <i>Dioscorea</i> | <i>cayenensis</i> | West Wolega | Lalo Asabi | Aroji Serdo | 035°51'26"E | 09°05'26"N | 1834         |
| WWLA 21 | Fekadu Korsa Hunde | <i>Dioscoreaceae</i> | <i>Dioscorea</i> | <i>rotundata</i>  | West Wolega | Lalo Asabi | Aroji Serdo | 035°51'36"E | 09°05'10"N | 1881         |
| WWLA 22 | Fekadu Korsa Hunde | <i>Dioscoreaceae</i> | <i>Dioscorea</i> | <i>rotundata</i>  | West Wolega | Lalo Asabi | Aroji Serdo | 035°51'29"E | 09°04'42"N | 1854         |

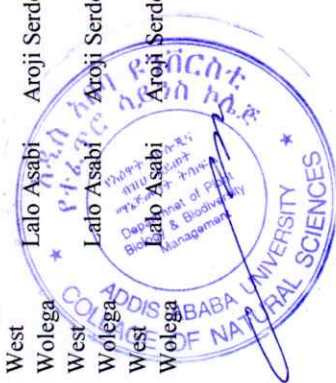

|         |                    |               |           |                   |             |           |             |             |            |      |
|---------|--------------------|---------------|-----------|-------------------|-------------|-----------|-------------|-------------|------------|------|
| EWTG 27 | Fekadu Korsa Hunde | Dioscoreaceae | Dioscorea | <i>bulbifera</i>  | East Wolega | Wayu Tuka | Gute        | 036°40'33"E | 09°02'01"N | 1880 |
| EWTG 29 | Fekadu Korsa Hunde | Dioscoreaceae | Dioscorea | <i>bulbifera</i>  | East Wolega | Wayu Tuka | Gute        | 036°40'55"E | 09°01'59"N | 1891 |
| EWTG 30 | Fekadu Korsa Hunde | Dioscoreaceae | Dioscorea | <i>bulbifera</i>  | East Wolega | Wayu Tuka | Gute        | 036°40'06"E | 09°02'05"N | 1890 |
| EWTG 31 | Fekadu Korsa Hunde | Dioscoreaceae | Dioscorea | <i>cayenensis</i> | East Wolega | Wayu Tuka | Gute        | 036°40'27"E | 09°01'53"N | 1869 |
| EWTG 33 | Fekadu Korsa Hunde | Dioscoreaceae | Dioscorea | <i>cayenensis</i> | East Wolega | Wayu Tuka | Gute        | 036°40'13"E | 09°02'20"N | 1908 |
| EWTG 34 | Fekadu Korsa Hunde | Dioscoreaceae | Dioscorea | <i>rotundata</i>  | East Wolega | Wayu Tuka | Gute        | 036°40'09"E | 09°02'15"N | 1893 |
| EWTG 35 | Fekadu Korsa Hunde | Dioscoreaceae | Dioscorea | <i>rotundata</i>  | East Wolega | Wayu Tuka | Gute        | 036°40'13"E | 09°02'15"N | 1897 |
| EWTG 36 | Fekadu Korsa Hunde | Dioscoreaceae | Dioscorea | <i>bulbifera</i>  | East Wolega | Wayu Tuka | Gute        | 036°40'15"E | 09°01'59"N | 1891 |
| EWSH 37 | Fekadu Korsa Hunde | Dioscoreaceae | Dioscorea | <i>cayenensis</i> | East Wolega | Sasigga   | Haro Fayisa | 036°30'53"E | 09°08'48"N | 1898 |
| EWSH 38 | Fekadu Korsa Hunde | Dioscoreaceae | Dioscorea | <i>cayenensis</i> | East Wolega | Sasigga   | Haro Fayisa | 036°30'50"E | 09°08'34"N | 1923 |
| EWSH 39 | Fekadu Korsa Hunde | Dioscoreaceae | Dioscorea | <i>cayenensis</i> | East Wolega | Sasigga   | Haro Fayisa | 036°31'06"E | 09°08'36"N | 1951 |
| EWSH 40 | Fekadu Korsa Hunde | Dioscoreaceae | Dioscorea | <i>cayenensis</i> | East Wolega | Sasigga   | Haro Fayisa | 036°31'09"E | 09°08'56"N | 1918 |
| EWSH 41 | Fekadu Korsa Hunde | Dioscoreaceae | Dioscorea | <i>cayenensis</i> | East Wolega | Sasigga   | Haro Fayisa | 036°31'04"E | 09°09'12"N | 1905 |
| EWSH 42 | Fekadu Korsa Hunde | Dioscoreaceae | Dioscorea | <i>cayenensis</i> | East Wolega | Sasigga   | Haro Fayisa | 036°31'10"E | 09°09'08"N | 1918 |
| EWSH 43 | Fekadu Korsa Hunde | Dioscoreaceae | Dioscorea | <i>cayenensis</i> | East Wolega | Sasigga   | Haro Fayisa | 036°31'32"E | 09°09'07"N | 1860 |
| EWSH 44 | Fekadu Korsa Hunde | Dioscoreaceae | Dioscorea | <i>cayenensis</i> | East Wolega | Sasigga   | Haro Fayisa | 036°31'21"E | 09°09'15"N | 1869 |
| EWSH 45 | Fekadu Korsa Hunde | Dioscoreaceae | Dioscorea | <i>cayenensis</i> | East Wolega | Sasigga   | Haro Fayisa | 036°31'23"E | 09°09'21"N | 1856 |
| EWSH 46 | Fekadu Korsa Hunde | Dioscoreaceae | Dioscorea | <i>cayenensis</i> | East Wolega | Sasigga   | Haro Fayisa | 036°30'36"E | 09°09'13"N | 1869 |
| EWDF 47 | Fekadu Korsa Hunde | Dioscoreaceae | Dioscorea | <i>bulbifera</i>  | East Wolega | Digga     | Firomsa     | 036°26'13"E | 09°04'03"N | 2153 |
| EWDF 48 | Fekadu Korsa Hunde | Dioscoreaceae | Dioscorea | <i>bulbifera</i>  | East Wolega | Digga     | Firomsa     | 036°26'28"E | 09°04'04"N | 2113 |
| EWDF 49 | Fekadu Korsa Hunde | Dioscoreaceae | Dioscorea | <i>rotundata</i>  | East Wolega | Digga     | Firomsa     | 036°26'25"E | 09°04'29"N | 2079 |

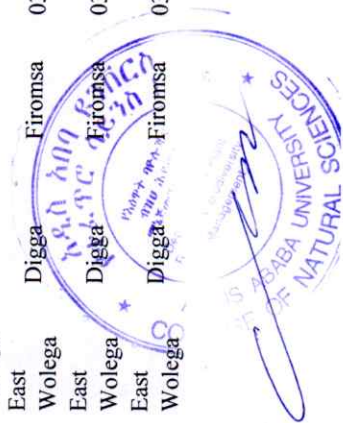

|         |                    |               |           |                   |             |            |        |             |            |      |
|---------|--------------------|---------------|-----------|-------------------|-------------|------------|--------|-------------|------------|------|
| EWDF 50 | Fekadu Korsu Hunde | Dioscoreaceae | Dioscorea | <i>cayenensis</i> | East Wolega | Digga      | Fiomsa | 036°25'56"E | 09°04'12"N | 2021 |
| EWDF 51 | Fekadu Korsu Hunde | Dioscoreaceae | Dioscorea | <i>cayenensis</i> | East Wolega | Digga      | Fiomsa | 036°26'58"E | 09°04'02"N | 2066 |
| EWDF 52 | Fekadu Korsu Hunde | Dioscoreaceae | Dioscorea | <i>bulbifera</i>  | East Wolega | Digga      | Fiomsa | 036°26'46"E | 09°03'47"N | 2085 |
| EWDF 53 | Fekadu Korsu Hunde | Dioscoreaceae | Dioscorea | <i>cayenensis</i> | East Wolega | Digga      | Fiomsa | 036°26'32"E | 09°04'11"N | 2090 |
| EWDF 54 | Fekadu Korsu Hunde | Dioscoreaceae | Dioscorea | <i>rotundata</i>  | East Wolega | Digga      | Fiomsa | 036°26'27"E | 09°04'29"N | 2074 |
| EWDF 55 | Fekadu Korsu Hunde | Dioscoreaceae | Dioscorea | <i>cayenensis</i> | East Wolega | Digga      | Fiomsa | 036°26'07"E | 09°04'27"N | 2144 |
| EWDF 56 | Fekadu Korsu Hunde | Dioscoreaceae | Dioscorea | <i>bulbifera</i>  | East Wolega | Digga      | Fiomsa | 036°25'57"E | 09°03'56"N | 2036 |
| EWDF 57 | Fekadu Korsu Hunde | Dioscoreaceae | Dioscorea | <i>rotundata</i>  | East Wolega | Digga      | Fiomsa | 036°25'51"E | 09°04'11"N | 2036 |
| EWDF 58 | Fekadu Korsu Hunde | Dioscoreaceae | Dioscorea | <i>cayenensis</i> | East Wolega | Digga      | Fiomsa | 036°26'37"E | 09°03'17"N | 2139 |
| EWGG 59 | Fekadu Korsu Hunde | Dioscoreaceae | Dioscorea | <i>bulbifera</i>  | East Wolega | Guto Gidda | Gari   | 036°35'52"E | 09°08'28"N | 2008 |
| EWGG 60 | Fekadu Korsu Hunde | Dioscoreaceae | Dioscorea | <i>bulbifera</i>  | East Wolega | Guto Gidda | Gari   | 036°36'24"E | 09°09'15"N | 1903 |
| EWGG 61 | Fekadu Korsu Hunde | Dioscoreaceae | Dioscorea | <i>bulbifera</i>  | East Wolega | Guto Gidda | Gari   | 036°34'52"E | 09°09'25"N | 1884 |
| EWGG 62 | Fekadu Korsu Hunde | Dioscoreaceae | Dioscorea | <i>bulbifera</i>  | East Wolega | Guto Gidda | Gari   | 036°35'07"E | 09°10'04"N | 1850 |
| EWGG 63 | Fekadu Korsu Hunde | Dioscoreaceae | Dioscorea | <i>cayenensis</i> | East Wolega | Guto Gidda | Gari   | 036°36'39"E | 09°10'16"N | 1808 |
| EWGG 64 | Fekadu Korsu Hunde | Dioscoreaceae | Dioscorea | <i>cayenensis</i> | East Wolega | Guto Gidda | Gari   | 036°34'04"E | 09°08'28"N | 1815 |
| EWGG 65 | Fekadu Korsu Hunde | Dioscoreaceae | Dioscorea | <i>cayenensis</i> | East Wolega | Guto Gidda | Gari   | 036°34'06"E | 09°08'06"N | 1669 |
| EWGG 66 | Fekadu Korsu Hunde | Dioscoreaceae | Dioscorea | <i>cayenensis</i> | East Wolega | Guto Gidda | Gari   | 036°34'12"E | 09°07'51"N | 1802 |
| WWNK 79 | Fekadu Korsu Hunde | Dioscoreaceae | Dioscorea | <i>alata</i>      | West Wolega | Nejo       | Kemi   | 035°27'50"E | 09°29'13"N | 1875 |
| WWNK 80 | Fekadu Korsu Hunde | Dioscoreaceae | Dioscorea | <i>rotundata</i>  | West Wolega | Nejo       | Kemi   | 035°28'15"E | 09°29'30"N | 1877 |
| WWNK 81 | Fekadu Korsu Hunde | Dioscoreaceae | Dioscorea | <i>rotundata</i>  | West Wolega | Nejo       | Kemi   | 035°27'21"E | 09°29'25"N | 1903 |
| WWNK 82 | Fekadu Korsu Hunde | Dioscoreaceae | Dioscorea | <i>bulbifera</i>  | West Wolega | Nejo       | Kemi   | 035°27'12"E | 09°29'16"N | 1906 |

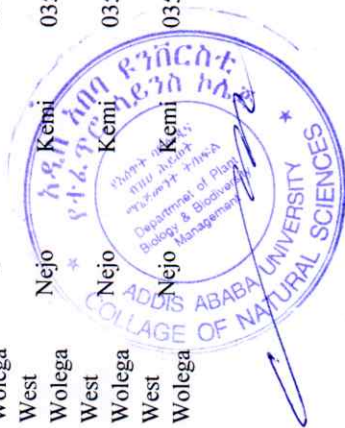

|          |                    |               |           |            |             |       |             |             |            |      |
|----------|--------------------|---------------|-----------|------------|-------------|-------|-------------|-------------|------------|------|
| WWNK 83  | Fekadu Korsu Hunde | Dioscoreaceae | Dioscorea | cayenensis | West Wolega | Nejo  | Kemi        | 035°27'50"E | 09°29'02"N | 1886 |
| WWNK 86  | Fekadu Korsu Hunde | Dioscoreaceae | Dioscorea | alata      | West Wolega | Nejo  | Kemi        | 035°27'44"E | 09°28'19"N | 1913 |
| WWNK 87  | Fekadu Korsu Hunde | Dioscoreaceae | Dioscorea | alata      | West Wolega | Nejo  | Kemi        | 035°26'59"E | 09°28'13"N | 1893 |
| WWNK 88  | Fekadu Korsu Hunde | Dioscoreaceae | Dioscorea | rotundata  | West Wolega | Nejo  | Kemi        | 035°26'41"E | 09°28'43"N | 1891 |
| WWNK 89  | Fekadu Korsu Hunde | Dioscoreaceae | Dioscorea | bulbifera  | West Wolega | Nejo  | Kemi        | 035°26'18"E | 09°27'41"N | 1857 |
| WWNK 90  | Fekadu Korsu Hunde | Dioscoreaceae | Dioscorea | cayenensis | West Wolega | Nejo  | Kemi        | 035°27'22"E | 09°27'10"N | 1816 |
| WWNG 91  | Fekadu Korsu Hunde | Dioscoreaceae | Dioscorea | rotundata  | West Wolega | Nejo  | Gida burusa | 035°33'14"E | 09°31'23"N | 1905 |
| WWNG 92  | Fekadu Korsu Hunde | Dioscoreaceae | Dioscorea | alata      | West Wolega | Nejo  | Gida burusa | 035°32'31"E | 09°31'07"N | 1915 |
| WWNG 93  | Fekadu Korsu Hunde | Dioscoreaceae | Dioscorea | alata      | West Wolega | Nejo  | Gida burusa | 035°32'12"E | 09°31'50"N | 1906 |
| WWNG 94  | Fekadu Korsu Hunde | Dioscoreaceae | Dioscorea | rotundata  | West Wolega | Nejo  | Gida burusa | 035°32'43"E | 09°32'24"N | 1889 |
| WWNT 100 | Fekadu Korsu Hunde | Dioscoreaceae | Dioscorea | cayenensis | West Wolega | Mendi | Togori      | 035°34'27"E | 09°32'21"N | 1914 |
| WWMT 101 | Fekadu Korsu Hunde | Dioscoreaceae | Dioscorea | cayenensis | West Wolega | Mendi | Togori      | 035°08'25"E | 09°41'28"N | 1638 |
| WWMT 102 | Fekadu Korsu Hunde | Dioscoreaceae | Dioscorea | bulbifera  | West Wolega | Mendi | Togori      | 035°08'52"E | 09°40'22"N | 1588 |
| WWMT 103 | Fekadu Korsu Hunde | Dioscoreaceae | Dioscorea | bulbifera  | West Wolega | Mendi | Togori      | 035°07'31"E | 09°40'00"N | 1650 |
| WWMT 105 | Fekadu Korsu Hunde | Dioscoreaceae | Dioscorea | bulbifera  | West Wolega | Mendi | Togori      | 035°10'08"E | 09°42'12"N | 1578 |
| WWMT 106 | Fekadu Korsu Hunde | Dioscoreaceae | Dioscorea | cayenensis | West Wolega | Mendi | Togori      | 035°09'37"E | 09°44'42"N | 1645 |
| WWMT 107 | Fekadu Korsu Hunde | Dioscoreaceae | Dioscorea | cayenensis | West Wolega | Mendi | Togori      | 035°34'33"E | 09°32'27"N | 1919 |
| WWMT 108 | Fekadu Korsu Hunde | Dioscoreaceae | Dioscorea | bulbifera  | West Wolega | Mendi | Togori      | 035°08'35"E | 09°41'28"N | 1633 |
| WWMB 109 | Fekadu Korsu Hunde | Dioscoreaceae | Dioscorea | bulbifera  | West Wolega | Mendi | Bijit       | 035°08'42"E | 09°40'32"N | 1548 |
| WWMB 110 | Fekadu Korsu Hunde | Dioscoreaceae | Dioscorea | bulbifera  | West Wolega | Mendi | Bijit       | 035°07'39"E | 09°40'02"N | 1655 |
| WWMB 111 | Fekadu Korsu Hunde | Dioscoreaceae | Dioscorea | cayenensis | West Wolega | Mendi | Bijit       | 035°10'18"E | 09°42'22"N | 1568 |

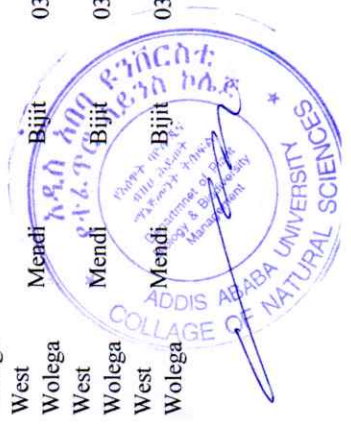

|          |                    |               |           |                   |             |           |            |             |            |      |
|----------|--------------------|---------------|-----------|-------------------|-------------|-----------|------------|-------------|------------|------|
| WWMB 113 | Fekadu Korsa Hunde | Dioscoreaceae | Dioscorea | <i>cayenensis</i> | West Wolega | Mendi     | Bijit      | 035°09'27"E | 09°04'40"N | 1640 |
| LALO 1   | Fekadu Korsa Hunde | Dioscoreaceae | Dioscorea | <i>rotundata</i>  | East Wolega | Guba Sayo | Sombo Kejo | 037°02'42"E | 09°05'34"N | 1646 |
| LALO 2   | Fekadu Korsa Hunde | Dioscoreaceae | Dioscorea | <i>rotundata</i>  | East Wolega | Guba Sayo | Sombo Kejo | 037°02'42"E | 09°05'34"N | 1646 |
| LALO 3   | Fekadu Korsa Hunde | Dioscoreaceae | Dioscorea | <i>rotundata</i>  | East Wolega | Guba Sayo | Sombo Kejo | 037°02'42"E | 09°05'34"N | 1646 |
| LALO 4   | Fekadu Korsa Hunde | Dioscoreaceae | Dioscorea | <i>rotundata</i>  | East Wolega | Guba Sayo | Sombo Kejo | 037°02'42"E | 09°05'34"N | 1646 |
| LALO 6   | Fekadu Korsa Hunde | Dioscoreaceae | Dioscorea | <i>rotundata</i>  | East Wolega | Guba Sayo | Sombo Kejo | 037°02'42"E | 09°05'34"N | 1646 |
| LALO 7   | Fekadu Korsa Hunde | Dioscoreaceae | Dioscorea | <i>rotundata</i>  | East Wolega | Guba Sayo | Sombo Kejo | 037°02'42"E | 09°05'34"N | 1646 |
| LALO 8   | Fekadu Korsa Hunde | Dioscoreaceae | Dioscorea | <i>rotundata</i>  | East Wolega | Guba Sayo | Sombo Kejo | 037°02'42"E | 09°05'34"N | 1646 |
| LALO 9   | Fekadu Korsa Hunde | Dioscoreaceae | Dioscorea | <i>rotundata</i>  | East Wolega | Guba Sayo | Sombo Kejo | 037°02'42"E | 09°05'34"N | 1646 |
| LALO 10  | Fekadu Korsa Hunde | Dioscoreaceae | Dioscorea | <i>rotundata</i>  | East Wolega | Guba Sayo | Sombo Kejo | 037°02'42"E | 09°05'34"N | 1646 |
| LALO 12  | Fekadu Korsa Hunde | Dioscoreaceae | Dioscorea | <i>rotundata</i>  | East Wolega | Guba Sayo | Sombo Kejo | 037°02'42"E | 09°05'34"N | 1646 |
| LALO 14  | Fekadu Korsa Hunde | Dioscoreaceae | Dioscorea | <i>rotundata</i>  | East Wolega | Guba Sayo | Sombo Kejo | 037°02'42"E | 09°05'34"N | 1646 |
| LALO 15  | Fekadu Korsa Hunde | Dioscoreaceae | Dioscorea | <i>rotundata</i>  | East Wolega | Guba Sayo | Sombo Kejo | 037°02'42"E | 09°05'34"N | 1646 |
| LALO 16  | Fekadu Korsa Hunde | Dioscoreaceae | Dioscorea | <i>rotundata</i>  | East Wolega | Guba Sayo | Sombo Kejo | 037°02'42"E | 09°05'34"N | 1646 |
| BULCHA 1 | Fekadu Korsa Hunde | Dioscoreaceae | Dioscorea | <i>alata</i>      | East Wolega | Guba Sayo | Sombo Kejo | 037°02'42"E | 09°05'34"N | 1646 |
| BULCHA 2 | Fekadu Korsa Hunde | Dioscoreaceae | Dioscorea | <i>alata</i>      | East Wolega | Guba Sayo | Sombo Kejo | 037002'42"E | 09005'34"N | 1646 |
| BULCHA 4 | Fekadu Korsa Hunde | Dioscoreaceae | Dioscorea | <i>alata</i>      | East Wolega | Guba Sayo | Sombo Kejo | 037002'42"E | 09005'34"N | 1646 |
| BULCHA 5 | Fekadu Korsa Hunde | Dioscoreaceae | Dioscorea | <i>alata</i>      | East Wolega | Guba Sayo | Sombo Kejo | 037°02'42"E | 09°05'34"N | 1646 |
| BULCHA 6 | Fekadu Korsa Hunde | Dioscoreaceae | Dioscorea | <i>alata</i>      | East Wolega | Guba Sayo | Sombo Kejo | 037°02'42"E | 09°05'34"N | 1646 |
| BULCHA 7 | Fekadu Korsa Hunde | Dioscoreaceae | Dioscorea | <i>alata</i>      | East Wolega | Guba Sayo | Sombo Kejo | 037°02'42"E | 09°05'34"N | 1646 |

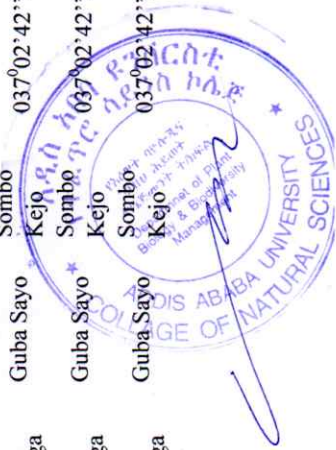

|           |                    |               |                  |                   |             |           |            |              |             |      |
|-----------|--------------------|---------------|------------------|-------------------|-------------|-----------|------------|--------------|-------------|------|
| BULCHA 8  | Fekadu Korsu Hunde | Dioscoreaceae | <i>Dioscorea</i> | <i>alata</i>      | East Wolega | Guba Sayo | Sombo Kejo | 037°02'42"E  | 09°05'34"N  | 1646 |
| BULCHA 9  | Fekadu Korsu Hunde | Dioscoreaceae | <i>Dioscorea</i> | <i>alata</i>      | East Wolega | Guba Sayo | Sombo Kejo | 037°02'42"E  | 09°05'34"N  | 1646 |
| BULCHA 10 | Fekadu Korsu Hunde | Dioscoreaceae | <i>Dioscorea</i> | <i>alata</i>      | East Wolega | Guba Sayo | Sombo Kejo | 037°02'42"E  | 09°05'34"N  | 1646 |
| BULCHA 11 | Fekadu Korsu Hunde | Dioscoreaceae | <i>Dioscorea</i> | <i>alata</i>      | East Wolega | Guba Sayo | Sombo Kejo | 037°02'42"E  | 09°05'34"N  | 1646 |
| G1        | Fekadu Korsu Hunde | Dioscoreaceae | <i>Dioscorea</i> | <i>cayenensis</i> | Metekel     | Debate    | Gesess     | 036° 11'48"E | 10° 42'82"N | 1309 |
| G2        | Fekadu Korsu Hunde | Dioscoreaceae | <i>Dioscorea</i> | <i>bulbifera</i>  | Metekel     | Debate    | Gesess     | 036° 21'08"E | 10° 51'42"N | 1305 |
| G6        | Fekadu Korsu Hunde | Dioscoreaceae | <i>Dioscorea</i> | <i>bulbifera</i>  | Metekel     | Debate    | Gesess     | 036° 17'40"E | 10° 48'74"N | 1300 |
| G11       | Fekadu Korsu Hunde | Dioscoreaceae | <i>Dioscorea</i> | <i>cayenensis</i> | Metekel     | Debate    | Gesess     | 036° 32'24"E | 10° 65'82"N | 1319 |
| G12       | Fekadu Korsu Hunde | Dioscoreaceae | <i>Dioscorea</i> | <i>cayenensis</i> | Metekel     | Debate    | Gesess     | 036° 39'18"E | 10° 70'52"N | 1337 |
| G14       | Fekadu Korsu Hunde | Dioscoreaceae | <i>Dioscorea</i> | <i>bulbifera</i>  | Metekel     | Debate    | Gesess     | 036° 44'42"E | 10° 75'76"N | 1350 |
| G15       | Fekadu Korsu Hunde | Dioscoreaceae | <i>Dioscorea</i> | <i>bulbifera</i>  | Metekel     | Debate    | Gesess     | 036° 35'60"E | 10° 66'96"N | 1345 |
| G16       | Fekadu Korsu Hunde | Dioscoreaceae | <i>Dioscorea</i> | <i>cayenensis</i> | Metekel     | Debate    | Gesess     | 036° 53'48"E | 10° 84'82"N | 1360 |
| G17       | Fekadu Korsu Hunde | Dioscoreaceae | <i>Dioscorea</i> | <i>cayenensis</i> | Metekel     | Debate    | Gesess     | 036° 58'11"E | 10° 89'45"N | 1369 |
| G21       | Fekadu Korsu Hunde | Dioscoreaceae | <i>Dioscorea</i> | <i>bulbifera</i>  | Metekel     | Debate    | Gesess     | 036° 65'22"E | 10° 90'52"N | 1382 |
| G23       | Fekadu Korsu Hunde | Dioscoreaceae | <i>Dioscorea</i> | <i>bulbifera</i>  | Metekel     | Debate    | Gesess     | 036° 49'02"E | 10° 80'38"N | 1374 |

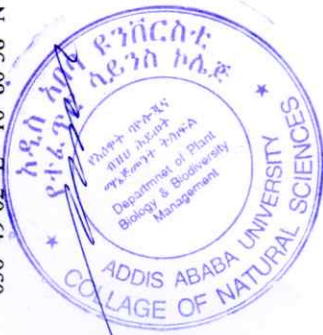

Supplement: Supplementary file 3 [file 7970dc7bc86638e0086ef402.pdf]
