# Supplementary material for: Genetic diversity and population structure of Yam (Dioscorea species) from Western Ethiopia as revealed by simple sequence repeat markers
Source: Research Square preprint supplement (doi:10.21203/rs.3.rs-1905131/v1), 2022-08-26

Photo take during sample collection of yam from farmers’ field in Western Ethiopia, East Wollegga zone.


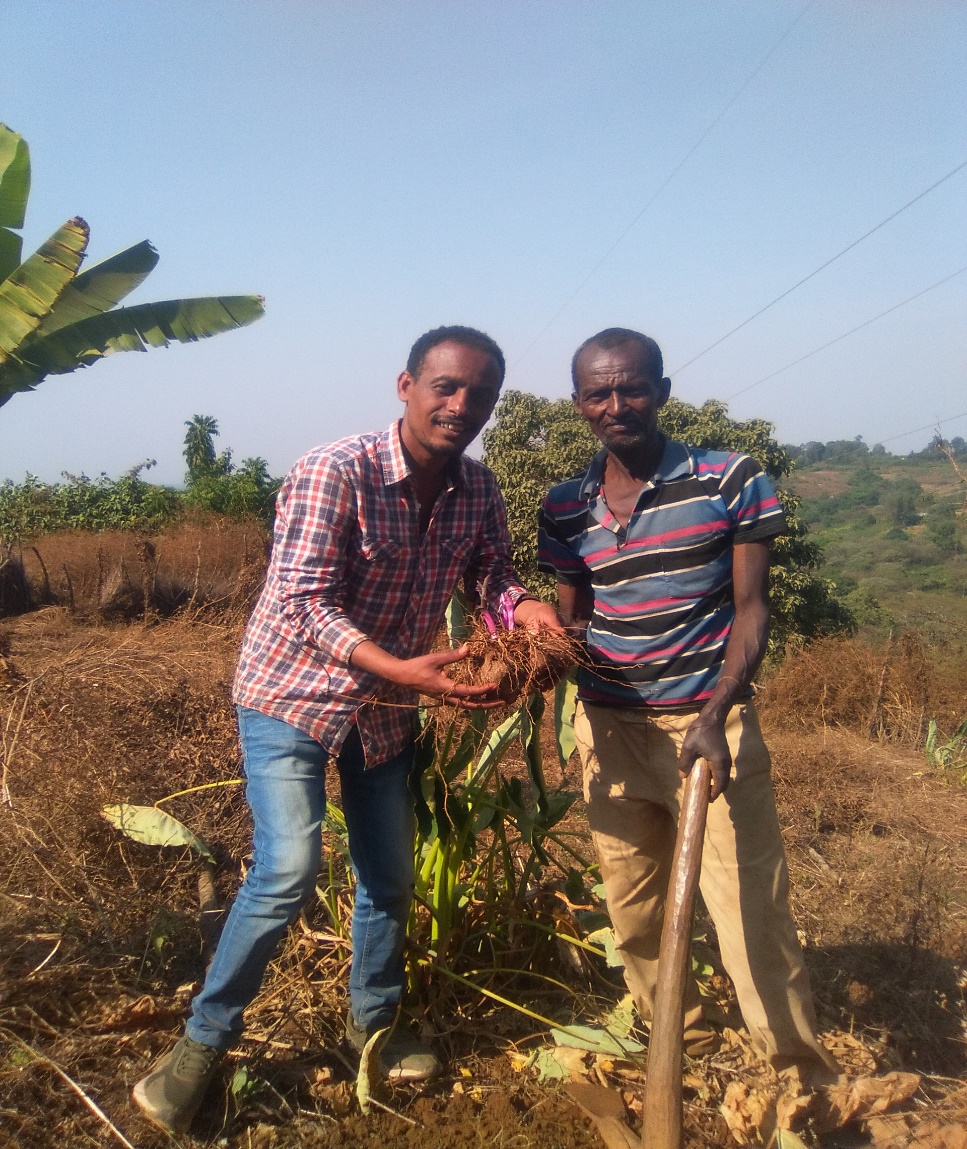

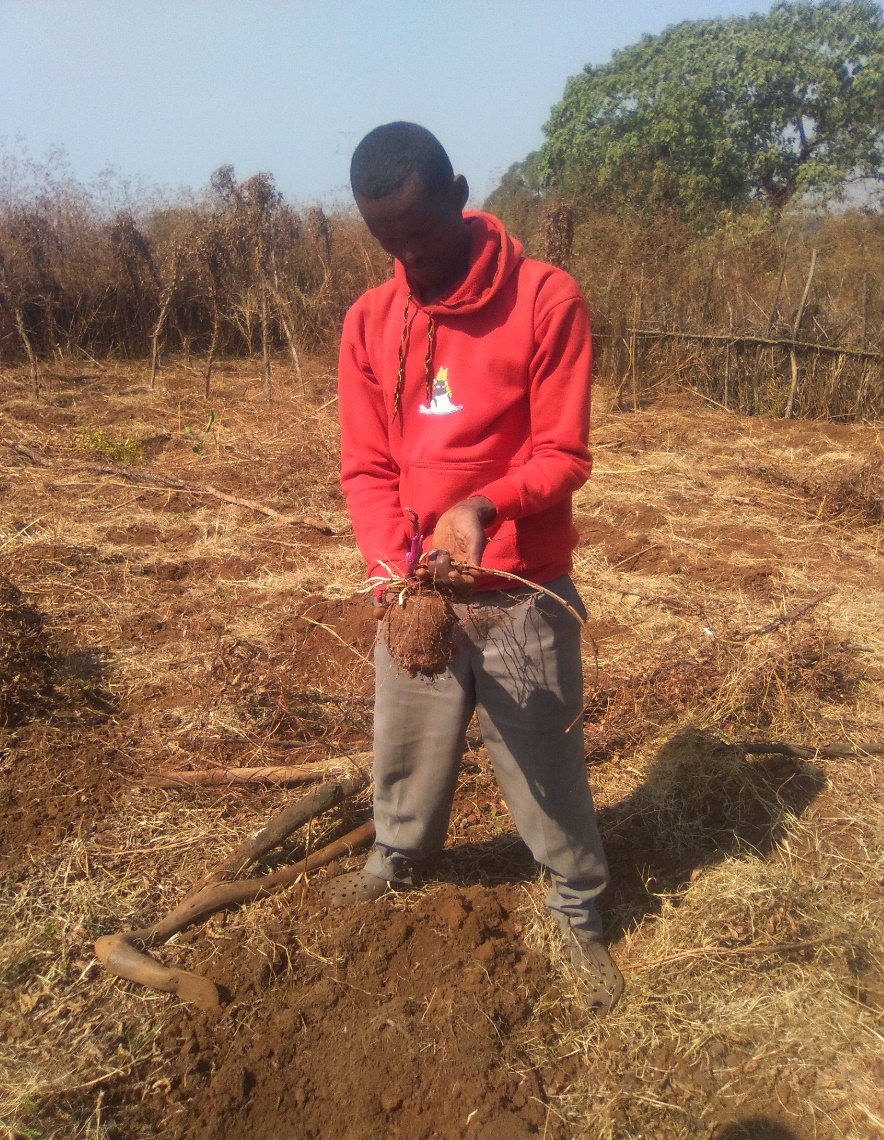


Appendix 4. *Dioscorea species* grown in the greenhouse of National Agricultural Biotechnology Center, Holeta, Ethiopia in 2021GC


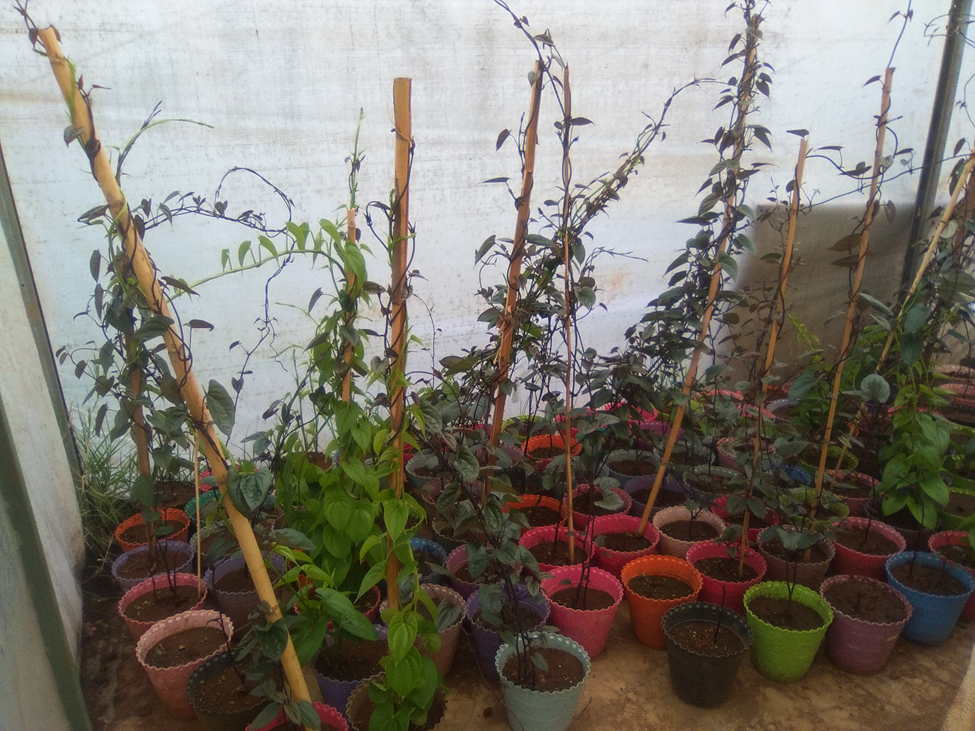

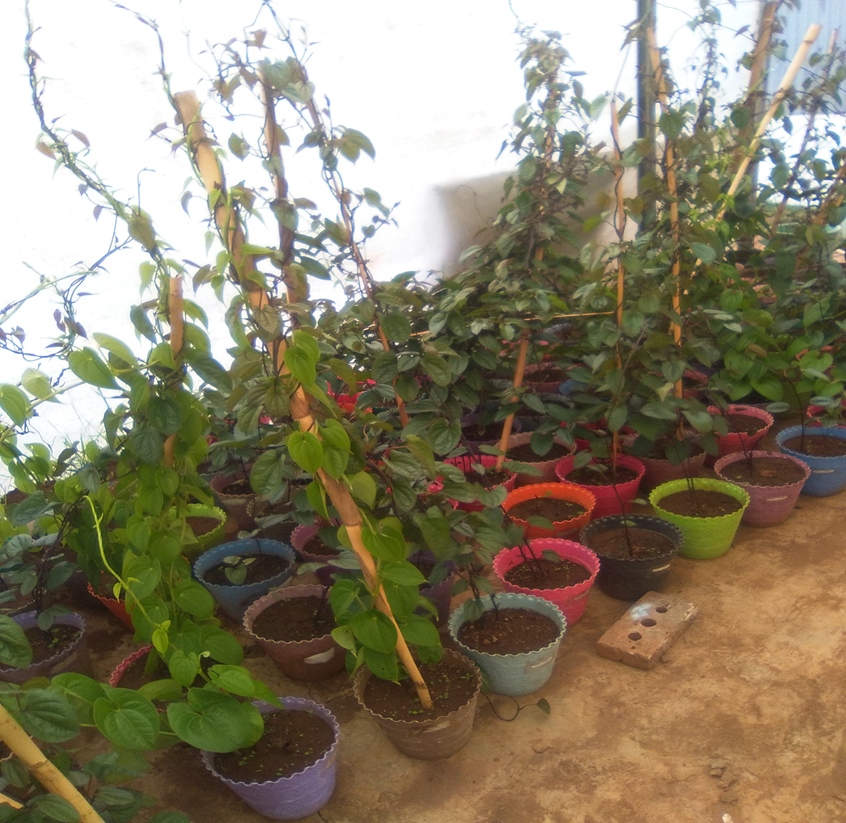

Supplement: Supplementary file 1 [file 07dae06ea38ac557a20c39d7.docx]
