# Supplementary material for: Genetic diversity and population structure of Yam (Dioscorea species) from Western Ethiopia as revealed by simple sequence repeat markers
Source: Research Square preprint supplement (doi:10.21203/rs.3.rs-1905131/v1), 2022-08-26
Supplement: Supplementary file 2 [file 398f86fbd9d38f6b88ed055d.docx]

Sample of DNA extracted from yam genotypes and its PCR product using yam 12 SSR marker


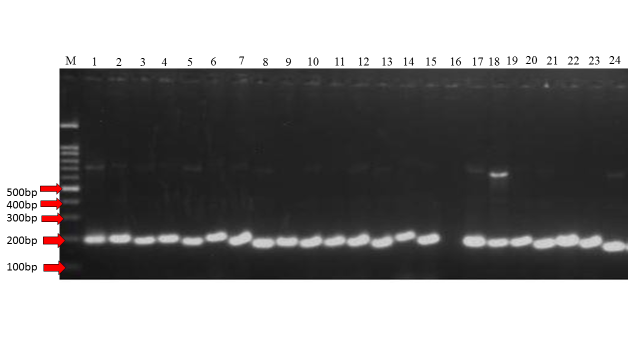


bp= base pairs, M= 100bp ladder, and number 1-24 indicated DNA extracted from yam genotypes
